# Supplementary material for: Trauma, a Matter of the Heart—Molecular Mechanism of Post-Traumatic Cardiac Dysfunction
Source: MDPI journal article supplement (doi:10.3390/ijms22020737), 2021-01-13
Supplement: s1 [file s1]

## Supplementary Materials

# Trauma, a Matter of the Heart—Molecular Mechanism of Post-Traumatic Cardiac Dysfunction

Birte Weber <sup>1</sup>, Ina Lackner <sup>1</sup>, Florian Gebhard <sup>1</sup>, Theodore Miclau <sup>2</sup> and Miriam Kalbitz <sup>1,\*</sup>

<sup>1</sup> Department of Traumatology, Hand-, Plastic-, and Reconstructive Surgery, Center of Surgery, University of Ulm, 86081 Ulm, Germany; birte.weber@uni-ulm.de (B.W.); ina.lackner@uni-ulm.de (I.L.); florian.gebhard@uniklinik-ulm.de (F.G.)

<sup>2</sup> Orthopaedic Trauma Institute, Department of Orthopaedic Surgery, University of California, 2550 23rd Street, San Francisco, CA 94110, USA; Theodore.Miclau@ucsf.edu

\* Correspondence: miriam.kalbitz@uniklinik-ulm.de

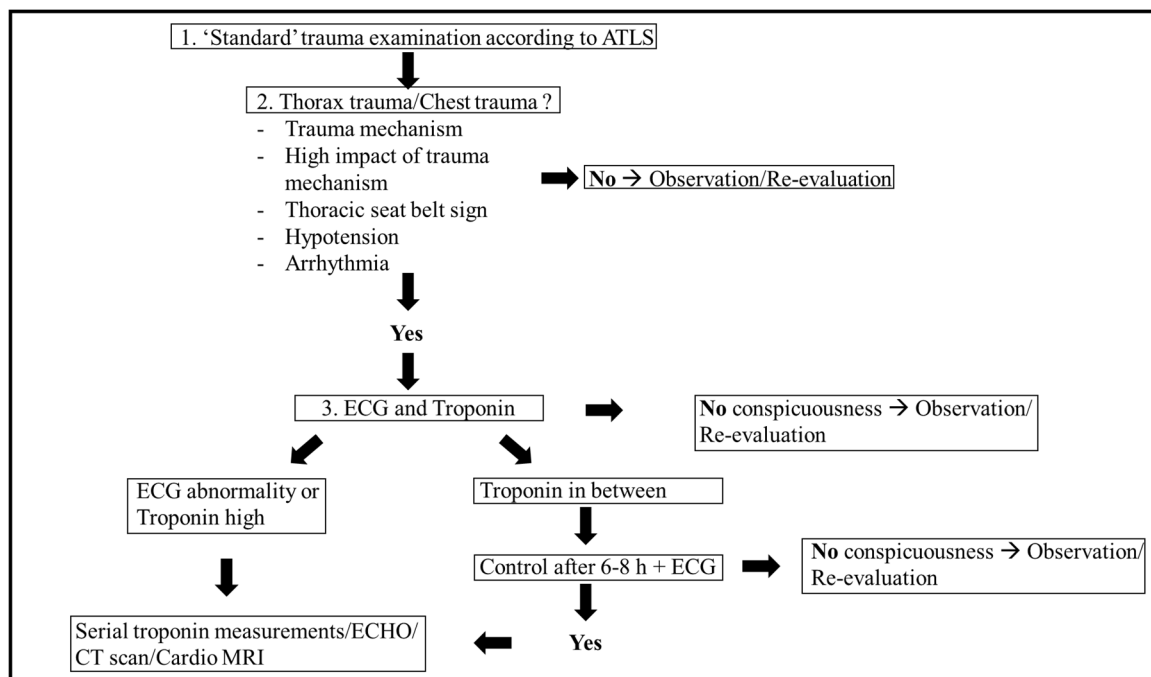

Supplementary Figure S1. Diagnostic algorithm for cardiac damage.
